# Supplementary material for: Exploring the interaction between Salvia miltiorrhiza and α-glucosidase: insights from computational analysis and experimental studies
Source: Royal Society of Chemistry journal article supplement (doi:10.1039/c8ra04772c), 2018-01-01
Supplement: c8ra04772c1.pdf [file c8ra04772c1.pdf]

## Supplementary material

### Exploring the interaction between *Salvia miltiorrhiza* and $\alpha$ -glucosidase: Insights from computational analysis and experimental studies

Hongjin Tang<sup>a,\*</sup>, Dongsheng Zhao<sup>b</sup>

<sup>a</sup> *College of Biological and Chemical Engineering, Anhui Polytechnic University,  
Wuhu 241000, P. R. China.*

<sup>b</sup> *State Key Laboratory of Natural Medicines, China Pharmaceutical University,  
Nanjing 210009, P. R. China.*

---

\* Corresponding author.

*E-mail address:* tanghongjin@126.com (H.-J. Tang).



## Outline of the Supplementary material

### Figures

**Fig. S1** Re-docking results of the original ligand  $\alpha$ -D-glucose binding to  $\alpha$ -glucosidase. Key residues are shown as stick models, and hydrogen bonds are labeled as yellow dashed lines. The cognate ligand appears in blue and the re-docking structure is colored in red.

**Fig. S2** View of superimposed docking conformations for the molecules binding to the active pocket of  $\alpha$ -glucosidase. Key residues are shown as stick models, and hydrogen bonds are labeled as yellow dashed lines. Compounds SAC and LA are colored as red and blue, respectively.

### Tables

**Table S1** The list of chemicals identified in *Salvia miltiorrhiza* and their docking scores when binding to the active site of XO.

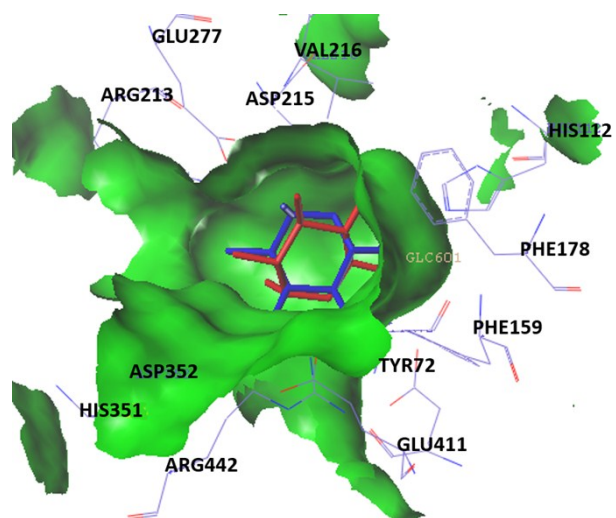

**Fig. S1** Re-docking results of the original ligand  $\alpha$ -D-glucose binding to  $\alpha$ -glucosidase. Key residues are shown as stick models, and hydrogen bonds are labeled as yellow dashed lines. The cognate ligand appears in blue and the re-docking structure is colored in red.

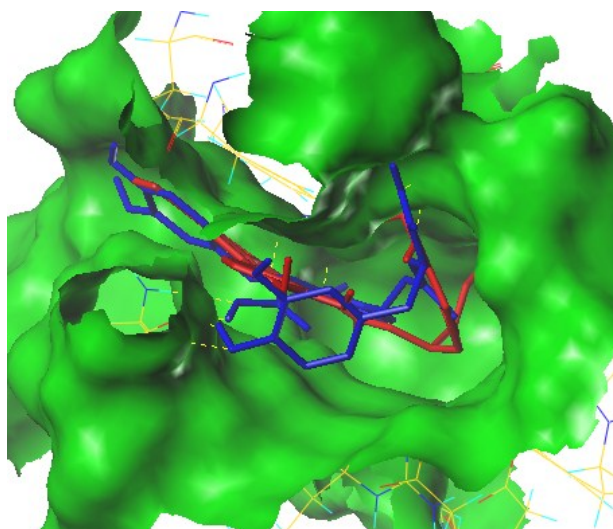

**Fig. S2** View of superimposed docking conformations for the molecules binding to the active pocket of  $\alpha$ -glucosidase. Key residues are shown as stick models, and hydrogen bonds are labeled as yellow dashed lines. Compounds SAC and LA are colored as red and blue, respectively.

**Table S1** The list of chemicals identified in *Salvia miltiorrhiza* and their docking scores when binding to the active site of XO.

| No. | Compound name                      | Total score | Crash   | Polar  | Similarity | Cscore |
|-----|------------------------------------|-------------|---------|--------|------------|--------|
| 107 | Voglibose                          | 9.2304      | -1.8504 | 7.0369 | 0.733      | 4      |
| 101 | Salvianolic acid A methyl ester    | 8.9762      | -3.4979 | 4.7451 | 0.508      | 4      |
| 104 | Miglitol                           | 8.9406      | -3.946  | 5.6308 | 0.724      | 3      |
| 61  | Salviaflaside                      | 8.256       | -2.3649 | 7.5879 | 0.674      | 4      |
| 16  | Danshenxinkun D                    | 8.2025      | -2.908  | 1.5773 | 0.576      | 5      |
| 39  | Salvianolic acid A                 | 8.0625      | -4.8119 | 5.2313 | 0.461      | 5      |
| 6   | Ailanthoidol                       | 7.9983      | -2.6038 | 1.7588 | 0.558      | 5      |
| 7   | Ammonium-potassium lithospermate B | 7.9471      | -4.9875 | 5.2545 | 0.411      | 2      |
| 73  | Salvinal                           | 7.944       | -1.849  | 1.1792 | 0.501      | 3      |
| 66  | Salvianolic acid C                 | 7.781       | -1.3509 | 3.6274 | 0.416      | 2      |
| 21  | Dimethyl lithospermate             | 7.7762      | -2.4858 | 3.3555 | 0.306      | 1      |
| 54  | Prolithospermic acid               | 7.5764      | -1.602  | 4.1771 | 0.479      | 5      |
| 62  | Salvianan                          | 7.5739      | -1.5589 | 0.0009 | 0.415      | 5      |
| 36  | Lithospermic acid                  | 7.4909      | -4.7748 | 5.1816 | 0.385      | 3      |
| 38  | Methyl rosmarinate                 | 7.3039      | -1.4381 | 4.4873 | 0.496      | 3      |
| 48  | Monomethyl lithospermate           | 7.2932      | -2.3384 | 5.1734 | 0.611      | 3      |
| 24  | Ethyl lithospermate                | 7.2234      | -3.2101 | 2.6722 | 0.309      | 1      |
| 67  | Salvianolic acid D                 | 7.0714      | -1.6177 | 4.2302 | 0.563      | 2      |
| 108 | DNJ                                | 7.0843      | -1.5381 | 7.2341 | 0.4472     | 3      |
| 98  | Curcumin                           | 7.0368      | -3.3968 | 4.1913 | 0.485      | 5      |
| 98  | Lithospermic acid dimethyl ester   | 6.9227      | -2.5488 | 3.8819 | 0.576      | 2      |
| 105 | Quercetin                          | 6.9021      | -0.5736 | 4.3644 | 0.495      | 2      |
| 63  | Salvianen                          | 6.7496      | -1.6808 | 0.0019 | 0.419      | 5      |
| 69  | Salvianolic acid F                 | 6.7124      | -1.0378 | 2.5665 | 0.518      | 4      |
| 71  | Salvianolic acid I                 | 6.7064      | -1.9836 | 6.8996 | 0.545      | 4      |
| 75  | Sibiriquinone A                    | 6.6425      | -1.3782 | 0.0001 | 0.442      | 4      |
| 82  | Tanshindiol C                      | 6.5428      | -1.6438 | 3.2699 | 0.567      | 4      |
| 106 | Resveratrol                        | 6.5283      | -0.8755 | 3.9377 | 0.552      | 4      |
| 88  | Tanshinone IIB                     | 6.4413      | -3.2199 | 1.8774 | 0.465      | 5      |
| 31  | Isosalvianolic acid C              | 6.3885      | -1.2262 | 3.9306 | 0.566      | 2      |
| 2   | 1,2-Didehydromiltirone             | 6.3201      | -4.7113 | 0.1113 | 0.442      | 5      |
| 11  | Cryptoacetalide                    | 6.1736      | -1.2694 | 0      | 0.427      | 5      |
| 100 | Salvianic acid A methyl ester      | 6.1606      | -0.877  | 3.6551 | 0.519      | 5      |
| 43  | Miltiodiol                         | 6.1311      | -2.1751 | 1.434  | 0.424      | 3      |
| 103 | Acarbose                           | 5.9797      | -1.6866 | 2.5186 | 0.575      | 5      |
| 90  | Trijuganone A                      | 5.9083      | -3.032  | 1.8776 | 0.256      | 4      |
| 85  | Tanshinol B                        | 5.8389      | -0.9408 | 1.1286 | 0.552      | 4      |
| 80  | Tanshindiol A                      | 5.8366      | -1.101  | 1.0835 | 0.576      | 2      |
| 72  | Salvianolic acid J                 | 5.7766      | -2.2593 | 2.9293 | 0.566      | 3      |
| 96  | 16-Formyloxydanshenxinkun A        | 5.7497      | -1.4903 | 1.1084 | 0.419      | 3      |

|     |                                  |        |         |        |       |   |
|-----|----------------------------------|--------|---------|--------|-------|---|
| 81  | Tanshindiol B                    | 5.7423 | -1.2897 | 2.1997 | 0.503 | 4 |
| 52  | Nor-salvioxide                   | 5.7076 | -0.9472 | 0.9102 | 0.39  | 3 |
| 19  | Dihydroisotanshinone II          | 5.6842 | -1.3973 | 0.9662 | 0.389 | 5 |
| 10  | Carnosol                         | 5.6734 | -3.5497 | 2.6861 | 0.492 | 4 |
| 60  | Rosmarinic acid                  | 5.6697 | -2.1794 | 5.2282 | 0.453 | 3 |
| 58  | Przewaquinone B                  | 5.6638 | -0.4572 | 1.3714 | 0.495 | 3 |
| 23  | Epidanshenspiroketalactone       | 5.6557 | -2.5258 | 0.1439 | 0.138 | 4 |
| 14  | Danshenxinkun B                  | 5.6346 | -1.9321 | 1.431  | 0.472 | 3 |
| 5   | 15,16-Dihydrotanshinone I        | 5.6313 | -2.6326 | 3.1371 | 0.538 | 3 |
| 3   | 1,2-Dihydrotanshinone I          | 5.6035 | -1.6549 | 0.958  | 0.322 | 5 |
| 32  | Isotanshinone I                  | 5.5694 | -0.3056 | 0.0147 | 0.393 | 4 |
| 59  | Przewaquinone C                  | 5.5014 | -1.6211 | 1.9732 | 0.526 | 5 |
| 13  | Danshenxinkun A                  | 5.4955 | -1.571  | 2.4696 | 0.55  | 4 |
| 57  | Przewaquinone A                  | 5.4724 | -1.4571 | 0.1178 | 0.454 | 4 |
| 15  | Danshenxinkun C                  | 5.46   | -1.5292 | 2.4481 | 0.224 | 4 |
| 102 | Salvianolic acid C methyl ester  | 5.4299 | -1.5386 | 4.0003 | 0.394 | 4 |
| 64  | Salvianic acid A (danshensu)     | 5.3959 | -0.7189 | 4.845  | 0.649 | 4 |
| 34  | Isotanshinone IIB                | 5.373  | -2.1601 | 0.8953 | 0.218 | 3 |
| 76  | Sibiriquinone B                  | 5.3441 | -2.545  | 0.0001 | 0.446 | 4 |
| 79  | Tanshinaldehyde                  | 5.327  | -2.9892 | 0.7836 | 0.395 | 5 |
| 94  | 3-Hydroxymethylenetanshinquinone | 5.3007 | -1.8257 | 2.124  | 0.291 | 4 |
| 26  | Formyltanshinone                 | 5.2819 | -1.6515 | 0.9186 | 0.393 | 4 |
| 84  | Tanshinol A                      | 5.2725 | -0.4297 | 1.2488 | 0.542 | 4 |
| 18  | Dihydroisotanshinone I           | 5.2523 | -2.6567 | 0.8773 | 0.203 | 4 |
| 87  | Tanshinone IIA                   | 5.2427 | -2.0109 | 0.259  | 0.385 | 4 |
| 41  | Methylene tanshinquinone         | 5.151  | -0.7186 | 0.0118 | 0.409 | 3 |
| 30  | Isoimperatorin                   | 5.0987 | -1.3398 | 0.9851 | 0.36  | 3 |
| 91  | Trijuganone B                    | 5.0285 | -0.2997 | 0.0009 | 0.412 | 4 |
| 95  | Tetrahydrotanshinone             | 5.0285 | -0.2997 | 0.0009 | 0.412 | 4 |
| 8   | Baicalin                         | 5.0011 | -3.073  | 5.9734 | 0.66  | 4 |
| 27  | Hydroxytanshinone IIA            | 4.9756 | -2.0615 | 0.3938 | 0.393 | 5 |
| 25  | Ferruginol                       | 4.8877 | -4.4314 | 1.3545 | 0.465 | 4 |
| 49  | Neocryptotanshinone              | 4.8806 | -2.8158 | 0.9913 | 0.453 | 3 |
| 29  | Isoferulic acid                  | 4.8188 | -0.4525 | 2.3006 | 0.488 | 3 |
| 9   | Caffeic acid                     | 4.8035 | -0.4582 | 4.9008 | 0.447 | 3 |
| 20  | Dihydrotanshinone I              | 4.8021 | -3.5857 | 1.1615 | 0.217 | 5 |
| 74  | Salviolone                       | 4.7673 | -1.8622 | 0.0055 | 0.367 | 4 |
| 78  | Sugiol                           | 4.7634 | -3.7825 | 1.4158 | 0.467 | 4 |
| 83  | Tanshinlactone                   | 4.703  | -0.4827 | 0      | 0.392 | 4 |
| 33  | Isotanshinone IIA                | 4.701  | -3.5621 | 0.0228 | 0.402 | 5 |
| 70  | Salvianolic acid G               | 4.4879 | -0.9263 | 1.0917 | 0.649 | 4 |
| 1   | 1,2,5,6-Tetrahydrotanshinone I   | 4.397  | -0.6718 | 0.0016 | 0.418 | 5 |
| 51  | Neosalvianen                     | 4.316  | -2.7495 | 0.0305 | 0.335 | 4 |
| 12  | Cryptotanshinone                 | 4.283  | -3.0168 | 0.0895 | 0.44  | 4 |

|    |                                    |          |           |        |       |   |
|----|------------------------------------|----------|-----------|--------|-------|---|
| 56 | Protocatechuic aldehyde            | 4.1276   | -0.1525   | 3.5784 | 0.489 | 4 |
| 86 | Tanshinone I                       | 4.1219   | -2.6882   | 1.2504 | 0.188 | 4 |
| 68 | Salvianolic acid E                 | 4.0632   | -8.2318   | 6.0663 | 0.381 | 2 |
| 44 | Miltionone I                       | 4.0115   | -1.8124   | 0.0003 | 0.412 | 1 |
| 55 | Protocatechuic acid                | 4.0066   | -0.4866   | 3.7967 | 0.715 | 5 |
| 22 | Epicryptoacetalide                 | 3.9486   | -2.6758   | 0.001  | 0.206 | 5 |
| 45 | Miltionone II                      | 3.9373   | -3.2175   | 0.0862 | 0.429 | 5 |
| 42 | Methylenedihydrotan-shinquinone    | 3.7928   | -2.0524   | 0      | 0.375 | 5 |
| 47 | Miltirone                          | 3.7842   | -2.975    | 0      | 0.362 | 1 |
| 53 | Nortanshinone                      | 3.7414   | -1.6023   | 0.0385 | 0.466 | 5 |
| 28 | Isocryptotanshinone                | 3.3603   | -4.2606   | 1.0126 | 0.399 | 5 |
| 97 | Isosalvianolic acid C methyl ester | 3.0371   | -8.0513   | 1.0158 | 0.562 | 4 |
| 4  | 1-Ketoisocryptotanshinone          | 2.9538   | -1.8968   | 0      | 0.443 | 5 |
| 77 | Stigmasterol                       | 2.725    | -6.6141   | 0.9919 | 0.361 | 2 |
| 17 | Daucosterol                        | 2.6813   | -8.1387   | 4.2069 | 0.644 | 4 |
| 50 | Neo-przewaquinone A                | 2.4038   | -1.1388   | 0.009  | 0.173 | 2 |
| 46 | Miltipolone                        | 1.6387   | -4.0017   | 1.3989 | 0.167 | 2 |
| 40 | Methyl tanshinonate                | 1.6309   | -2.2041   | 0.0278 | 0.174 | 1 |
| 93 | $\beta$ -Sitosterol                | 0.036    | -8.9396   | 1.1385 | 0.358 | 2 |
| 35 | Lithospermate B                    | -0.214   | -11.2344  | 2.1619 | 0.423 | 2 |
| 89 | Tigogenin                          | -0.8191  | -8.5743   | 0.5828 | 0.308 | 1 |
| 65 | Salvianolic acid B                 | -2.7032  | -11.6938  | 2.7613 | 0.458 | 2 |
| 92 | Ursolic acid                       | -5.6972  | -16.1459  | 0.5263 | 0.298 | 1 |
| 37 | Magnesium lithospermate B          | -95.3961 | -100.6939 | 0.4175 | 0.547 | 2 |

---
